# Supplementary material for: Bright and efficient red emitting electroluminescent devices fabricated from ternary europium complexes
Source: Royal Society of Chemistry journal article supplement (doi:10.1039/d0tc00749h), 2020-01-01
Supplement: d0tc00749h1.pdf [file d0tc00749h1.pdf]

## **Bright and efficient red emitting electroluminescent devices containing a ternary europium complex with greater than 6% external quantum efficiency**

**Rashid Ilmi,<sup>\*a</sup> Muhammad S. Khan<sup>\*,a</sup> Weidong Sun<sup>b</sup>, José D. L. Dutra<sup>c</sup>, Willyan F. Oliveira<sup>c</sup>, Liang Zhou<sup>\*,b</sup> Wai-Yeung Wong<sup>\*d</sup>, Paul R. Raithby<sup>\*e</sup>**

<sup>a</sup>Department of Chemistry, Sultan Qaboos University, P. O. Box 36, Al Khod 123,

<sup>b</sup>State Key Laboratory of Rare Earth Resource Utilization, Changchun Institute of Applied Chemistry, Chinese Academy of Sciences, Renmin Street 5625, Changchun 130022, People's Republic of China.

<sup>c</sup>Pople Computational Chemistry Laboratory, Department of Chemistry, UFS, 49100-000 São Cristóvão, Sergipe, Brazil

<sup>d</sup>Department of Applied Biology and Chemical Technology, The Hong Kong Polytechnic University, Hung Hom, Kowloon, Hong Kong.

<sup>e</sup>Department of Chemistry, University of Bath, Claverton Down, Bath BA2 7AY, UK

### **Addresses and ORCID ID of corresponding authors:**

Rashid Ilmi : [rashidilmi@gmail.com](mailto:rashidilmi@gmail.com); 0000-0002-5165-5977

Muhammad S. Khan : [msk@squ.edu.om](mailto:msk@squ.edu.om); 0000-0001-5606-6832

Liang Zhou : [zhoul@ciac.ac.cn](mailto:zhoul@ciac.ac.cn); 0000-0002-2751-5974

Paul R. Raithby : [p.r.raithby@bath.ac.uk](mailto:p.r.raithby@bath.ac.uk); 0000-0002-2944-0662

Wai-Yeung Wong : [wai-yeung.wong@polyu.edu.hk](mailto:wai-yeung.wong@polyu.edu.hk); 0000-0002-9949-7525

## **Supporting Information**

## Contents

|                                                                                                                                                                                                                                                                                                                                                                                                                                                                    |    |
|--------------------------------------------------------------------------------------------------------------------------------------------------------------------------------------------------------------------------------------------------------------------------------------------------------------------------------------------------------------------------------------------------------------------------------------------------------------------|----|
| 1. Synthesis of Binary hydrated complexes.....                                                                                                                                                                                                                                                                                                                                                                                                                     | 4  |
| 1.1. [Eu(btfa) <sub>3</sub> (H <sub>2</sub> O) <sub>2</sub> ] and [Eu(nta) <sub>3</sub> (H <sub>2</sub> O) <sub>2</sub> ] .....                                                                                                                                                                                                                                                                                                                                    | 4  |
| 2. Theoretical Judd–Ofelt (J-O) intensity parameters ( $\Omega_\lambda$ ) ( $\lambda = 2, 4$ and $6$ ) .....                                                                                                                                                                                                                                                                                                                                                       | 4  |
| 3. Theoretical Quantum Yield.....                                                                                                                                                                                                                                                                                                                                                                                                                                  | 6  |
| 4. Full EL Device structures .....                                                                                                                                                                                                                                                                                                                                                                                                                                 | 7  |
| 4.1 Single EML Device based on <b>Eu-1</b> .....                                                                                                                                                                                                                                                                                                                                                                                                                   | 7  |
| 4.2 Double EML Device based on <b>Eu-1</b> .....                                                                                                                                                                                                                                                                                                                                                                                                                   | 7  |
| 4.3 Single EML Device based on <b>Eu-2</b> .....                                                                                                                                                                                                                                                                                                                                                                                                                   | 7  |
| 4.4 Double EML Device based on <b>Eu-2</b> .....                                                                                                                                                                                                                                                                                                                                                                                                                   | 8  |
| Table S1. Corrected emission intensity relative to $^5D_0 \rightarrow ^7F_1$ transition, Barycenter, %contribution of each transition of <b>Eu-1</b> and <b>Eu-2</b> in DCM solution at RT .....                                                                                                                                                                                                                                                                   | 9  |
| Table S2. Sparkle/RM1 model ZDO electronic densities ( $q$ ) and electrophilic superdelocalizabilities ( $SE$ ), by considering the B3LYP/SVP/MWB52 geometry, for each atom directly coordinated to Eu(III), in complexes <b>Eu-1</b> and <b>Eu-2</b> , together with corresponding charge factors ( $g$ ) and polarizabilities ( $\alpha$ ) from the fitting. Calculated electric dipole intensity parameters ( $\Omega_\lambda^{FED}$ ) for both complexes ..... | 10 |
| Table S3. Singlet and triplet excited states energy and corresponding distance from the Eu(III) nucleus to the electronic barycenter of the ligand donor state ( $R_L$ ) for the different RM1 geometries considered for the <b>Eu-1</b> and <b>Eu-2</b> complexes.....                                                                                                                                                                                            | 11 |
| Fig. S1. Positive mode ESI-MS spectrum of <b>Eu-1</b> complex in acetone solution. ....                                                                                                                                                                                                                                                                                                                                                                            | 12 |
| Fig. S2. FTI-R spectrum of solid <b>Eu-1</b> complex with its expansion from 2000 – 650 cm <sup>-1</sup> .<br>12                                                                                                                                                                                                                                                                                                                                                   |    |
| Fig. S3. Positive mode ESI-MS spectrum of <b>Eu-2</b> complex in acetone solution. ....                                                                                                                                                                                                                                                                                                                                                                            | 13 |
| Fig. S4. FTI-R spectra of solid <b>Eu-2</b> complex with its expansion from 2000 – 650 cm <sup>-1</sup> . .                                                                                                                                                                                                                                                                                                                                                        | 13 |
| Fig. S5. Geometries optimized at the RM1 level of theory for different structural possibilities considered for <b>Eu-1</b> . The values in the parentheses are the heat of formation for                                                                                                                                                                                                                                                                           |    |

each structure calculated with RM1. \*Conformation of the starting structure (CSD CODE 1942486). 14

Fig. S6. Geometries optimized at the RM1 level of theory for different structural possibilities considered for **Eu-2** complex. The values in the parentheses are the heat of formation for each structure calculated with RM1. .... 15

Fig. S7. Excitation spectra of the **Eu-1** and **Eu-2** complexes in DCM solution at RT. .... 16

Fig. S8. International Commission on Illumination (CIE) 1931 chromaticity diagram of **Eu-1** showing the observed color in DCM solution at RT. .... 17

Fig. S9. 1931 CIE chromaticity diagram of **Eu-2** showing the observed color in DCM solution at RT. .... 18

Fig. S10. Magnification of the region between 500 – 570 nm displaying  $^5D_1 \rightarrow ^7F_{1-2}$  transitions at RT for **Eu-1** complex. .... 19

Fig. S11. Magnification of the region between 500 – 570 nm displaying  $^5D_1 \rightarrow ^7F_1$  transitions at RT for **Eu-2** complex. .... 20

Fig. S12. Decay curve of **Eu-1** with fitted curve and observed luminescence lifetime in DCM at RT. 21

Fig. S13. Decay curve of **Eu-2** with fitted curve and observed luminescence lifetime in DCM at RT. 22

Fig. S14. Normalized EL spectra of the double-EML devices **4**, **5** and **6** of **Eu-1** operating at 10 mA/cm<sup>2</sup>. .... 23

Fig. S15. Normalized EL spectra of the double-EML devices **4**, **5** and **6** of **Eu-2** operating at 10 mA/cm<sup>2</sup>. .... 24

Fig. S16. CIE 1931 chromaticity diagrams of single EML devices **1**, **2** and **3** of **Eu-2** with magnified view operating at 10 mA/cm<sup>2</sup>. .... 25

Fig. S17. CIE 1931 chromaticity diagrams of single EML devices **4**, **5** and **6** of **Eu-1** with magnified view operating at 10 mA/cm<sup>2</sup>. .... 26

Fig. S18. CIE 1931 chromaticity diagrams of single EML devices **4**, **5** and **6** of **Eu-2** with magnified view operating at 10 mA/cm<sup>2</sup>. .... 26

## 1. Synthesis of Binary hydrated complexes

### 1.1. [Eu(btfa)<sub>3</sub>(H<sub>2</sub>O)<sub>2</sub>] and [Eu(nta)<sub>3</sub>(H<sub>2</sub>O)<sub>2</sub>]

Binary hydrated [Eu(btfa)<sub>3</sub>(H<sub>2</sub>O)<sub>2</sub>] and [Eu(nta)<sub>3</sub>(H<sub>2</sub>O)<sub>2</sub>] complexes (**Chart S1**) were synthesized by the conventional method.<sup>1</sup> Briefly, EuCl<sub>3</sub>·6H<sub>2</sub>O (Eu- 2.39 g, 6.57 mmol) aqueous solution was added dropwise through a dropping funnel to a solution of sodium salt of β-diketone (2.0 g, 19.97 mmol). The precipitate formed was filtered, washed with a copious amount of deionized water and dried in vacuum over P<sub>4</sub>O<sub>10</sub> and re-crystallized from DCM.

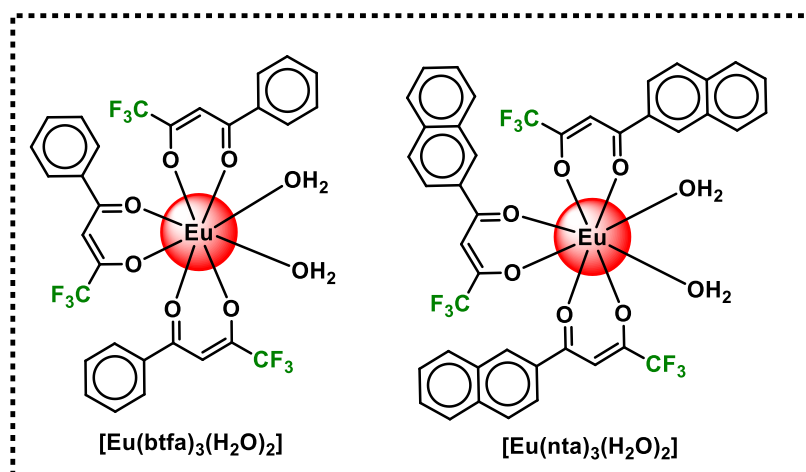

**Chart S1:** Chemical structures of binary hydrated [Eu(btfa)<sub>3</sub>(H<sub>2</sub>O)<sub>2</sub>] and [Eu(nta)<sub>3</sub>(H<sub>2</sub>O)<sub>2</sub>] complexes

## 2. Theoretical Judd–Ofelt (J-O) intensity parameters ( $\Omega_\lambda$ ) ( $\lambda = 2, 4$ and $6$ )

The theoretical intensity parameters derived from the Judd-Ofelt theory<sup>2</sup> were calculated by the following expression<sup>3</sup>:

$$\Omega_\lambda^{calc} = (2\lambda + 1) \sum_t^{\lambda-1, \lambda+1(odd)} \sum_{p=-t}^{t(all)} \frac{|B_{\lambda tp}|^2}{(2t+1)} \quad \text{Eq. S1}$$

$$B_{\lambda tp} = \frac{2}{\Delta E} \langle r^{t+1} \rangle \theta(t, \lambda) \gamma_p^t - \left[ \frac{(\lambda+1)(2\lambda+3)}{2\lambda+1} \right]^{1/2} \langle r^\lambda \rangle (1 - \sigma_\lambda) \langle f \| C^{(\lambda)} \| f \rangle \Gamma_p^t \delta_{t, \lambda+1} \quad \text{Eq. S2}$$

$$\gamma_p^t = \left( \frac{4\pi}{2t+1} \right)^{1/2} e^2 \sum_j \rho_j (2\beta_j)^{t+1} \frac{g_j}{R_j^{t+1}} Y_p^{t*}(\theta_j, \phi_j) \quad \text{Eq. S3}$$

$$\Gamma_p^t = \left( \frac{4\pi}{2t+1} \right)^{1/2} \sum_j \frac{\alpha_j}{R_j^{t+1}} Y_p^{t*}(\theta_j, \phi_j) \quad \text{Eq. S4}$$

The distance from atom  $j$  coordinated directly to the lanthanide ion ( $R_j$ ) together with the corresponding angular coordinates ( $\theta_j$  and  $\phi_j$ ) show the dependency of the theoretical intensity parameters on the complex structure. Eq. S2 contains the contribution from the forced electric dipole and dynamic coupling mechanisms. The theoretical  $\Omega_\lambda$  have been calculated by adjusting the charge factors ( $g_j$ ) and polarizabilities ( $\alpha_j$ ), Eq. S3 and S4, respectively, in order to reproduce the experimental values of  $\Omega_2$  and  $\Omega_4$ . The complete procedure used to calculate  $\Omega_\lambda$  is widely discussed in reference.<sup>4</sup>

The QDC model<sup>4</sup> implemented into LUMPAC<sup>5</sup> postulates that the  $g_j$  are obtained from the product between adjustable parameters ( $Q$ ) and each ZDO (*Zero Differential Overlap*) electronic density ( $q_j$ ) of each atom  $j$  coordinated directly to the lanthanide ion. Similarly, the QDC model postulates that the  $\alpha_j$  are calculated using two adjustable parameters ( $D$  and  $C$ )

$$g_j = Q \cdot q_j \quad \text{Eq. S5}$$

$$\alpha_j = SE_j \cdot D + C \quad \text{Eq. S6}$$

The ZDO electronic density and the electrophilic superdelocalizability ( $SE$ ) for any atom  $\mu$  of the complex are calculated by

$$q_\mu = 2 \sum_{i'}^{occ.} \sum_p^{N_\mu} |c_{pi'}^\mu|^2 \quad \text{Eq. S7}$$

$$SE_\mu = 2 \sum_{i'}^{occ.} \sum_p \sum_q \frac{c_{pi'}^\mu c_{qi'}^\mu}{\epsilon_{i'}} \quad \text{Eq. S8}$$

where  $i'$  runs through all the occupied molecular orbitals of the complex,  $p$  runs through all atomic orbitals,  $c_{pi'}^\mu$  is the corresponding linear coefficient, and  $\epsilon_i$  is the energy of the occupied molecular orbital  $i$ .

The theoretical radiative decay rate for europium is given by

$$A_{rad} = \frac{32e^2\pi^3\chi}{3\hbar(2J+1)} \sum_{\lambda=2,4,6} \nu[{}^5D_0 \rightarrow {}^7F_{J=\lambda}]^3 \Omega_{\lambda} \left| \left\langle {}^5D_0 \left\| U^{(\lambda)} \right\| {}^7F_{J=\lambda} \right\rangle \right|^2 + \frac{32\pi^3n^3\nu[{}^5D_0 \rightarrow {}^7F_1]^3}{3\hbar} S_{md} \quad \text{Eq. S9}$$

where  $e$  is the elementary charge;  $2J+1$  is the degeneracy of the initial state, in this case  ${}^5D_0$ , and therefore  $J=0$ .  $\chi$  is the Lorentz local-field correction term given by  $\chi = n(n^2 + 2)^2 / 9$ , in this work value of refractive index  $n$  equal to 1.424 was considered.  $\nu[{}^5D_0 \rightarrow {}^7F_J]$  are the energies of the barycenters of the respective transitions. The magnetic dipole strength of the  ${}^5D_0 \rightarrow {}^7F_1$  transition is theoretically evaluated as being  $S_{md} = 9,6 \times 10^{-42} \text{ esu}^2\text{cm}^2$ .

### 3. Theoretical Quantum Yield

The PLQY ( $q$ ) is defined as the ratio of the number of emitted photons by the lanthanide ion to the number of absorbed photons by the ligand.

$$q = \frac{A_{rad}\eta_{{}^5D_0}}{\varphi\eta_{S_0}} \quad \text{Eq. S10}$$

where the terms  $\eta_{S_0}$  and  $\eta_{{}^5D_0}$  correspond to the energetic population of the  $S_0$  and  ${}^5D_0$  states, respectively.  $\varphi$  is the absorption rate from the fundamental singlet to the excited singlet of the ligand. The normalized population of a given level  $j$  considered in the energy transfer modeling,  $\eta_j$ , are obtained from an equations system in the steady-state approximation.

$$\frac{d\eta_j}{dt} = -\sum_{i \neq j} W_{ji}\eta_j + \sum_{i \neq j} W_{ij}\eta_i \quad \text{Eq. S11}$$

where  $W_{ij}$  is the transfer rate from level  $i$  to level  $j$ , with the transition rates from and to the same state are zero. In the steady-state approximation  $\frac{d\eta_j}{dt} = 0$ , allowing that the set of algebraic equations derived from Eq. S11 can be solved analytically. The emission quantum yield for the complexes were calculated with LUMPAC 1.4.0.<sup>5</sup>

#### **4. Full EL Device structures**

##### **4.1 Single EML Device based on Eu-1**

**Device 1:** ITO/HAT-CN (6 nm)/HAT-CN (0.2 wt%): TAPC (50 nm)/**Eu-1** (3 wt%): 26DCzPPy (10 nm)/Tm3PyP26PyB (60 nm)/LiF (1 nm)/Al (100 nm)

**Device 2:** ITO/HAT-CN (6 nm)/HAT-CN (0.2 wt%): TAPC (50 nm)/**Eu-1** (4 wt%): 26DCzPPy (10 nm)/Tm3PyP26PyB (60 nm)/LiF (1 nm)/Al (100 nm)

**Device 3:** ITO/HAT-CN (6 nm)/HAT-CN (0.2 wt%): TAPC (50 nm)/**Eu-1** (5 wt%): 26DCzPPy (10 nm)/Tm3PyP26PyB (60 nm)/LiF (1 nm)/Al (100 nm)

##### **4.2 Double EML Device based on Eu-1**

**Device 4:** ITO/HAT-CN (6 nm)/HAT-CN (0.2 wt%): TAPC (50 nm)/**Eu-1** (3 wt%): TcTa (10 nm)/**Eu-1** (3 wt%): 26DCzPPy (10 nm)/Tm3PyP26PyB (60 nm)/LiF (1 nm)/Al (100 nm)

**Device 5:** ITO/HAT-CN (6 nm)/HAT-CN (0.2 wt%): TAPC (50 nm)/**Eu-1** (4 wt%): TcTa (10 nm)/**Eu-1** (4 wt%): 26DCzPPy (10 nm)/Tm3PyP26PyB (60 nm)/LiF (1 nm)/Al (100 nm)

**Device 6:** ITO/HAT-CN (6 nm)/HAT-CN (0.2 wt%): TAPC (50 nm)/**Eu-1** (5 wt%): TcTa (10 nm)/**Eu-1** (5 wt%): 26DCzPPy (10 nm)/Tm3PyP26PyB (60 nm)/LiF (1 nm)/Al (100 nm)

##### **4.3 Single EML Device based on Eu-2**

**Device 1:** ITO/HAT-CN (6 nm)/HAT-CN (0.2 wt%): TAPC (50 nm)/**Eu-2** (3 wt%): 26DCzPPy (10 nm)/Tm3PyP26PyB (60 nm)/LiF (1 nm)/Al (100 nm)

**Device 2:** ITO/HAT-CN (6 nm)/HAT-CN (0.2 wt%): TAPC (50 nm)/**Eu-2** (4 wt%): 26DCzPPy (10 nm)/Tm3PyP26PyB (60 nm)/LiF (1 nm)/Al (100 nm)

**Device 3:** ITO/HAT-CN (6 nm)/HAT-CN (0.2 wt%): TAPC (50 nm)/**Eu-2** (5 wt%): 26DCzPPy (10 nm)/Tm3PyP26PyB (60 nm)/LiF (1 nm)/Al (100 nm)

#### 4.4 Double EML Device based on Eu-2

**Device 4:** ITO/HAT-CN (6 nm)/HAT-CN (0.2 wt%): TAPC (50 nm)/**Eu-2** (3 wt%): TcTa (10 nm)/**Eu-2** (3 wt%): 26DCzPPy (10 nm)/Tm3PyP26PyB (60 nm)/LiF (1 nm)/Al (100 nm)

**Device 5:** ITO/HAT-CN (6 nm)/HAT-CN (0.2 wt%): TAPC (50 nm)/**Eu-2** (4 wt%): TcTa (10 nm)/**Eu-2** (4 wt%): 26DCzPPy (10 nm)/Tm3PyP26PyB (60 nm)/LiF (1 nm)/Al (100 nm)

**Device 6:** ITO/HAT-CN (6 nm)/HAT-CN (0.2 wt%): TAPC (50 nm)/**Eu-2** (5 wt%): TcTa (10 nm)/**Eu-2** (5 wt%): 26DCzPPy (10 nm)/Tm3PyP26PyB (60 nm)/LiF (1 nm)/Al (100 nm)



**Table S1.** Corrected emission intensity relative to  ${}^5D_0 \rightarrow {}^7F_1$  transition, Barycenter, %contribution of each transition of **Eu-1** and **Eu-2** in DCM solution at RT

|                                  | Corrected emission Intensity relative to ${}^5D_0 \rightarrow {}^7F_1$ transition |            |            |            |            |              |
|----------------------------------|-----------------------------------------------------------------------------------|------------|------------|------------|------------|--------------|
|                                  | $\int 0-0$                                                                        | $\int 0-1$ | $\int 0-2$ | $\int 0-3$ | $\int 0-4$ | $\int total$ |
| Eu-1                             |                                                                                   |            |            |            |            |              |
| Corrected intensity <sup>a</sup> | 0.24                                                                              | 1.00       | 18.89      | 0.63       | 2.06       | 22.82        |
| Barycenter (cm <sup>-1</sup> )   | 17253.59                                                                          | 16883.65   | 16214.77   | 15310.25   | 14338.68   |              |
| %contribution                    | 1.05%                                                                             | -          | 82.77%     | 2.76%      | 9.02%      |              |
| Eu-2                             |                                                                                   |            |            |            |            |              |
| Corrected intensity <sup>a</sup> | 0.23                                                                              | 1.00       | 20.42      | 0.61       | 2.21       | 24.47        |
| Barycenter (cm <sup>-1</sup> )   | 17261.37                                                                          | 16881.43   | 16218.07   | 15322.58   | (14337.79) |              |
| %contribution                    | [0.93%]                                                                           | -          | [83.44%]   | [2.49%]    | [9.03%]    |              |

<sup>a</sup>relative to the MD  ${}^5D_0 \rightarrow {}^7F_1$  transition

**Table S2.** Sparkle/RM1 model ZDO electronic densities ( $q$ ) and electrophilic superdelocalizabilities ( $SE$ ), by considering the B3LYP/SVP/MWB52 geometry, for each atom directly coordinated to  $\text{Eu}^{3+}$ , in complexes **Eu-1** and **Eu-2**, together with corresponding charge factors ( $g$ ) and polarizabilities ( $\alpha$ ) from the fitting. Calculated electric dipole intensity parameters ( $\Omega_{\lambda}^{\text{FED}}$ ) for both complexes

| Ligand<br>Atom | Eu-1                                                                                                                                                                                                                             |         |        |                   | Ligand<br>Atom | Eu-2                                                                                                                                                                                                                             |         |        |                   |
|----------------|----------------------------------------------------------------------------------------------------------------------------------------------------------------------------------------------------------------------------------|---------|--------|-------------------|----------------|----------------------------------------------------------------------------------------------------------------------------------------------------------------------------------------------------------------------------------|---------|--------|-------------------|
|                | Q = 0.0169 au <sup>-1</sup><br>D = 40.58 au <sup>-1</sup> ·Å <sup>3</sup><br>C = 19.32 Å <sup>3</sup><br>D/C = 2.10 au <sup>-1</sup>                                                                                             |         |        |                   |                | Q = 0.0319 au <sup>-1</sup><br>D = 42.32 au <sup>-1</sup> ·Å <sup>3</sup><br>C = 20.41 Å <sup>3</sup><br>D/C = 2.07 au <sup>-1</sup>                                                                                             |         |        |                   |
|                | q                                                                                                                                                                                                                                | SE      | g      | α                 |                | q                                                                                                                                                                                                                                | SE      | g      | α                 |
|                | (au)                                                                                                                                                                                                                             | (au)    |        | (Å <sup>3</sup> ) |                | (au)                                                                                                                                                                                                                             | (au)    |        | (Å <sup>3</sup> ) |
|                |                                                                                                                                                                                                                                  |         |        |                   |                |                                                                                                                                                                                                                                  |         |        |                   |
| O(DPEPO)       | 6.8450                                                                                                                                                                                                                           | -0.4289 | 0.1160 | 1.9161            | O(DPEPO)       | 6.8477                                                                                                                                                                                                                           | -0.4163 | 0.2187 | 2.7914            |
| O(DPEPO)       | 6.8338                                                                                                                                                                                                                           | -0.4360 | 0.1158 | 1.6286            | O(DPEPO)       | 6.8325                                                                                                                                                                                                                           | -0.4376 | 0.2182 | 1.8937            |
| O(btfa1)       | 6.3177                                                                                                                                                                                                                           | -0.4089 | 0.1070 | 2.7268            | O(нта1)        | 6.3191                                                                                                                                                                                                                           | -0.4194 | 0.2018 | 2.6610            |
| O(btfa )       | 6.3435                                                                                                                                                                                                                           | -0.4347 | 0.1075 | 1.6815            | O(нта1)        | 6.3427                                                                                                                                                                                                                           | -0.4484 | 0.2026 | 1.4357            |
| O(btfa2)       | 6.3395                                                                                                                                                                                                                           | -0.4184 | 0.1074 | 2.3415            | O(нта2)        | 6.3447                                                                                                                                                                                                                           | -0.4309 | 0.2026 | 2.1759            |
| O(btfa2)       | 6.3447                                                                                                                                                                                                                           | -0.4614 | 0.1075 | 0.5954            | O(нта2)        | 6.3242                                                                                                                                                                                                                           | -0.4677 | 0.2020 | 0.6177            |
| O(btfa3)       | 6.3367                                                                                                                                                                                                                           | -0.2841 | 0.1074 | 7.7923            | O(нта3)        | 6.3396                                                                                                                                                                                                                           | -0.3013 | 0.2025 | 7.6614            |
| O(btfa3)       | 6.3313                                                                                                                                                                                                                           | -0.2341 | 0.1073 | 9.8193            | O(нта3)        | 6.3401                                                                                                                                                                                                                           | -0.2370 | 0.2025 | 10.3838           |
|                | Ω <sub>2</sub> <sup>FED</sup> = 0.0001×10 <sup>-20</sup> cm <sup>2</sup><br>Ω <sub>4</sub> <sup>FED</sup> = 0.0022×10 <sup>-20</sup> cm <sup>2</sup><br>Ω <sub>6</sub> <sup>FED</sup> = 0.0049×10 <sup>-20</sup> cm <sup>2</sup> |         |        |                   |                | Ω <sub>2</sub> <sup>FED</sup> = 0.0005×10 <sup>-20</sup> cm <sup>2</sup><br>Ω <sub>4</sub> <sup>FED</sup> = 0.0079×10 <sup>-20</sup> cm <sup>2</sup><br>Ω <sub>6</sub> <sup>FED</sup> = 0.0167×10 <sup>-20</sup> cm <sup>2</sup> |         |        |                   |

Table S3. Singlet and triplet excited states energy and corresponding distance from the Eu(III) nucleus to the electronic barycenter of the ligand donor state ( $R_L$ ) for the different RM1 geometries considered for the **Eu-1** and **Eu-2** complexes

| Complex                  | $R_{L,sing.} (\text{\AA})$ | $E_{sing.} (\text{cm}^{-1})$ | $R_{L,trip.} (\text{\AA})$ | $E_{trip.} (\text{cm}^{-1})$ |
|--------------------------|----------------------------|------------------------------|----------------------------|------------------------------|
| <b>INDO/S-CIS // RM1</b> |                            |                              |                            |                              |
| <b>Eu-1</b>              |                            |                              |                            |                              |
| <b>Eu-1-1</b>            | 3.97                       | 36058.9                      | 4.90                       | 20720.2                      |
| <b>Eu-1-2</b>            | 3.81                       | 35713.3                      | 4.69                       | 20721.7                      |
| <b>Eu-1-3</b>            | 4.30                       | 35983.9                      | 4.89                       | 20896.7                      |
| <b>Eu-1-4</b>            | 4.28                       | 36604.6                      | 3.98                       | 21038.4                      |
| <b>Eu-1-5</b>            | 4.51                       | 36227.7                      | 4.69                       | 20969.0                      |
| <b>Eu-1-6</b>            | 4.25                       | 36402.8                      | 4.49                       | 20935.9                      |
| <b>Eu-1-7</b>            | 4.08                       | 35751.6                      | 4.25                       | 20865.5                      |
| <b>Eu-1-8</b>            | 4.35                       | 36122.6                      | 4.60                       | 20890.1                      |
| <b>Eu-2</b>              |                            |                              |                            |                              |
| <b>Eu-2-1</b>            | 5.25                       | 34962.9                      | 5.49                       | 20959.6                      |
| <b>Eu-2-2</b>            | 4.87                       | 35752.2                      | 5.95                       | 22009.4                      |
| <b>Eu-2-3</b>            | 4.91                       | 35883.7                      | 5.52                       | 21166.7                      |
| <b>Eu-2-4</b>            | 5.57                       | 36389.0                      | 5.49                       | 21058.1                      |
| <b>Eu-2-5</b>            | 5.34                       | 36956.9                      | 5.54                       | 21203.7                      |
| <b>Eu-2-6</b>            | 5.45                       | 36321.3                      | 5.69                       | 21120.7                      |
| <b>Eu-2-7</b>            | 5.16                       | 36546.1                      | 5.47                       | 21180.7                      |
| <b>Eu-2-8</b>            | 5.27                       | 36884.1                      | 5.50                       | 21128.2                      |

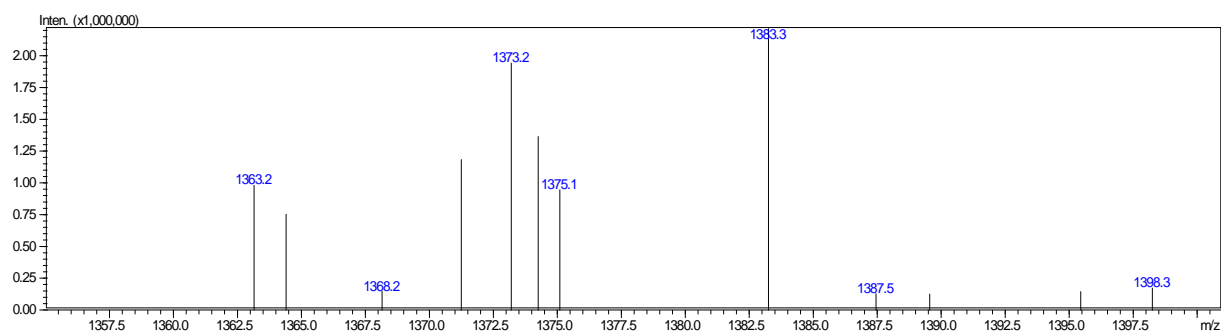

**Fig. S1.** Positive mode ESI-MS spectrum of **Eu-1** complex in acetone solution.

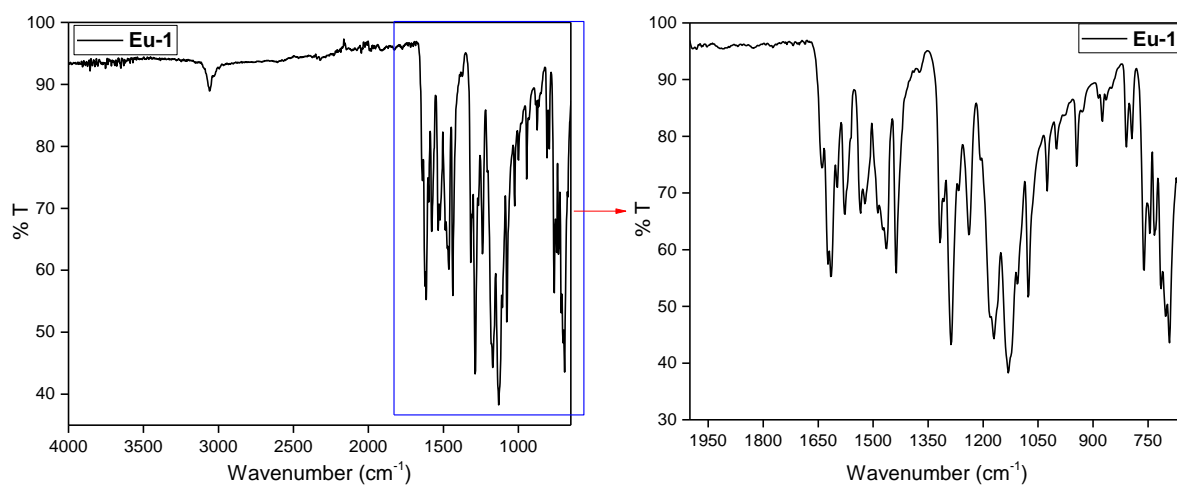

**Fig. S2.** FTIR spectrum of solid **Eu-1** complex with its expansion from 2000 – 650  $\text{cm}^{-1}$ .

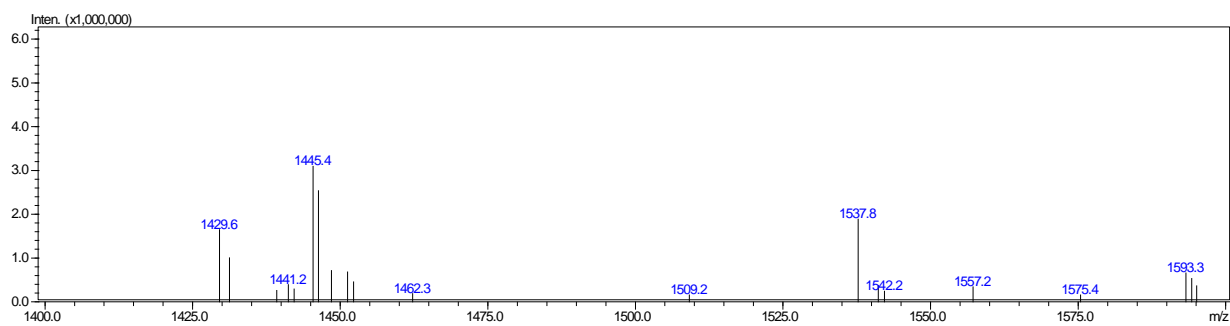

**Fig. S3.** Positive mode ESI-MS spectrum of **Eu-2** complex in acetone solution.

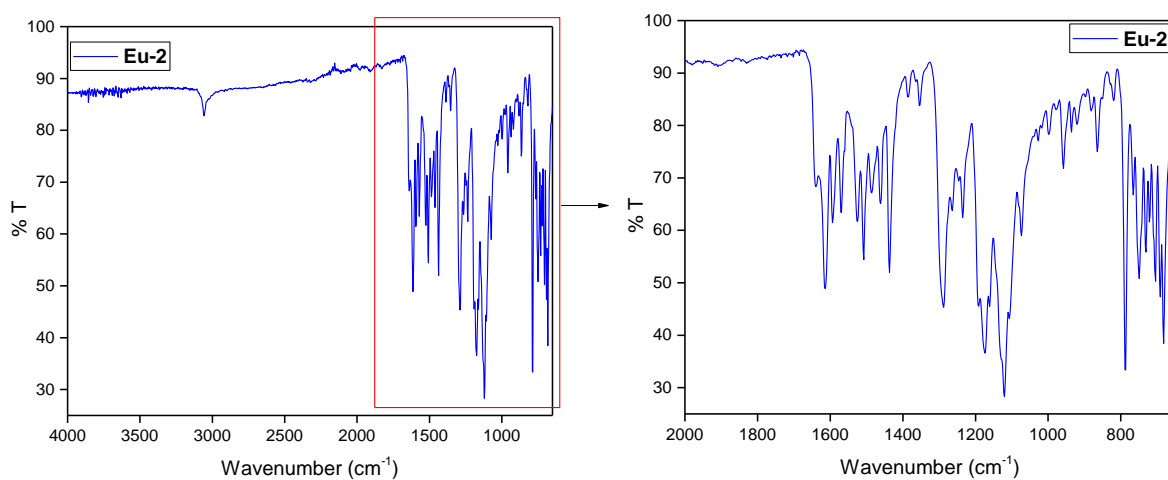

**Fig. S4.** FTIR spectra of solid **Eu-2** complex with its expansion from 2000 – 650  $\text{cm}^{-1}$ .

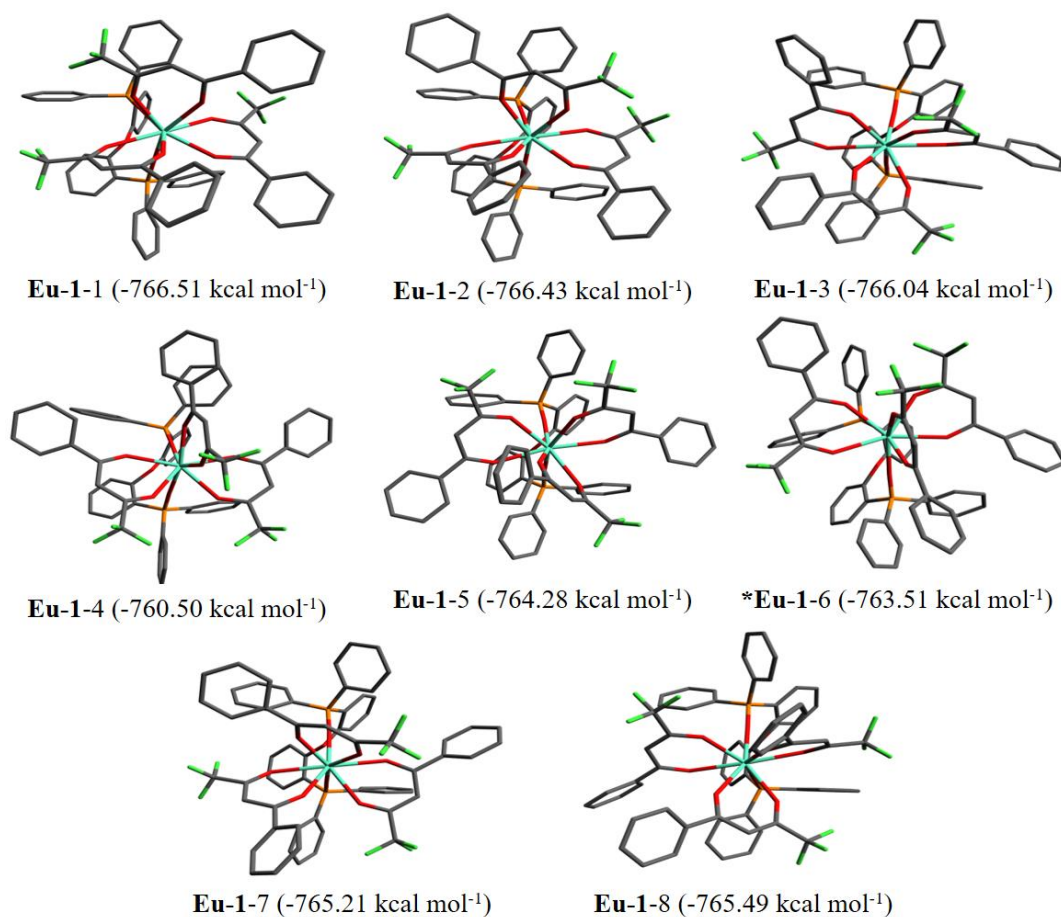

**Fig. S5.** Geometries optimized at the RM1 level of theory for different structural possibilities considered for **Eu-1**. The values in the parentheses are the heat of formation for each structure calculated with RM1. \*Conformation of the starting structure (CSD CODE 1942486).

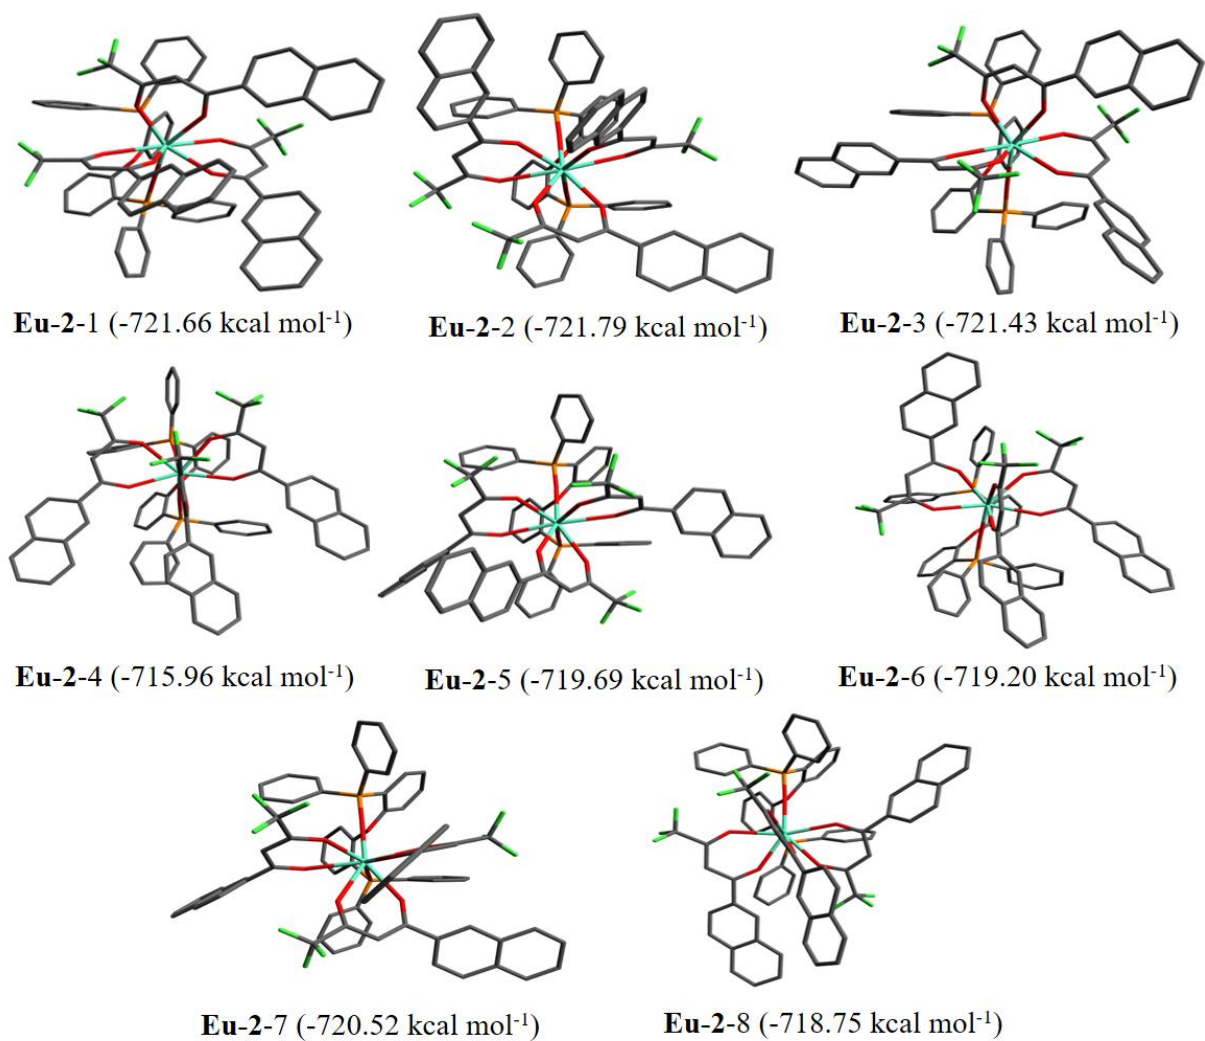

**Fig. S6.** Geometries optimized at the RM1 level of theory for different structural possibilities considered for **Eu-2** complex. The values in the parentheses are the heat of formation for each structure calculated with RM1.

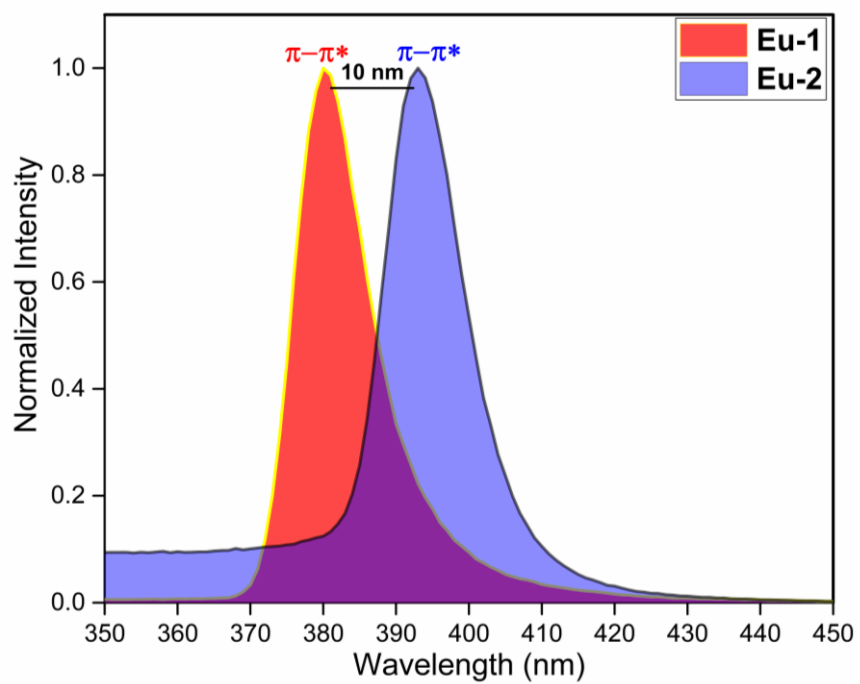

**Fig. S7.** Excitation spectra of the **Eu-1** and **Eu-2** complexes in DCM solution at RT.



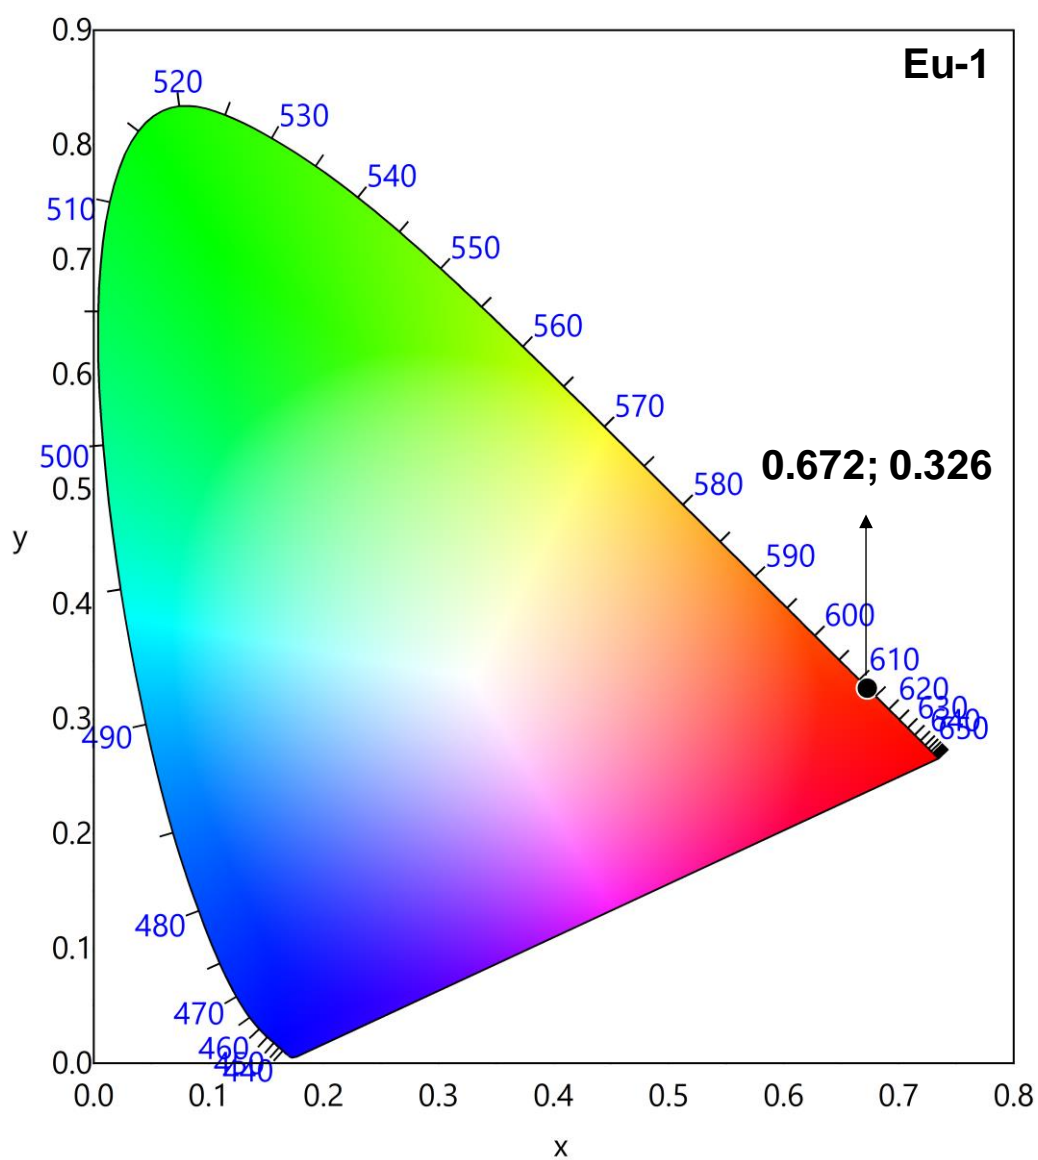

**Fig. S8.** International Commission on Illumination (CIE) 1931 chromaticity diagram of **Eu-1** showing the observed color in DCM solution at RT.

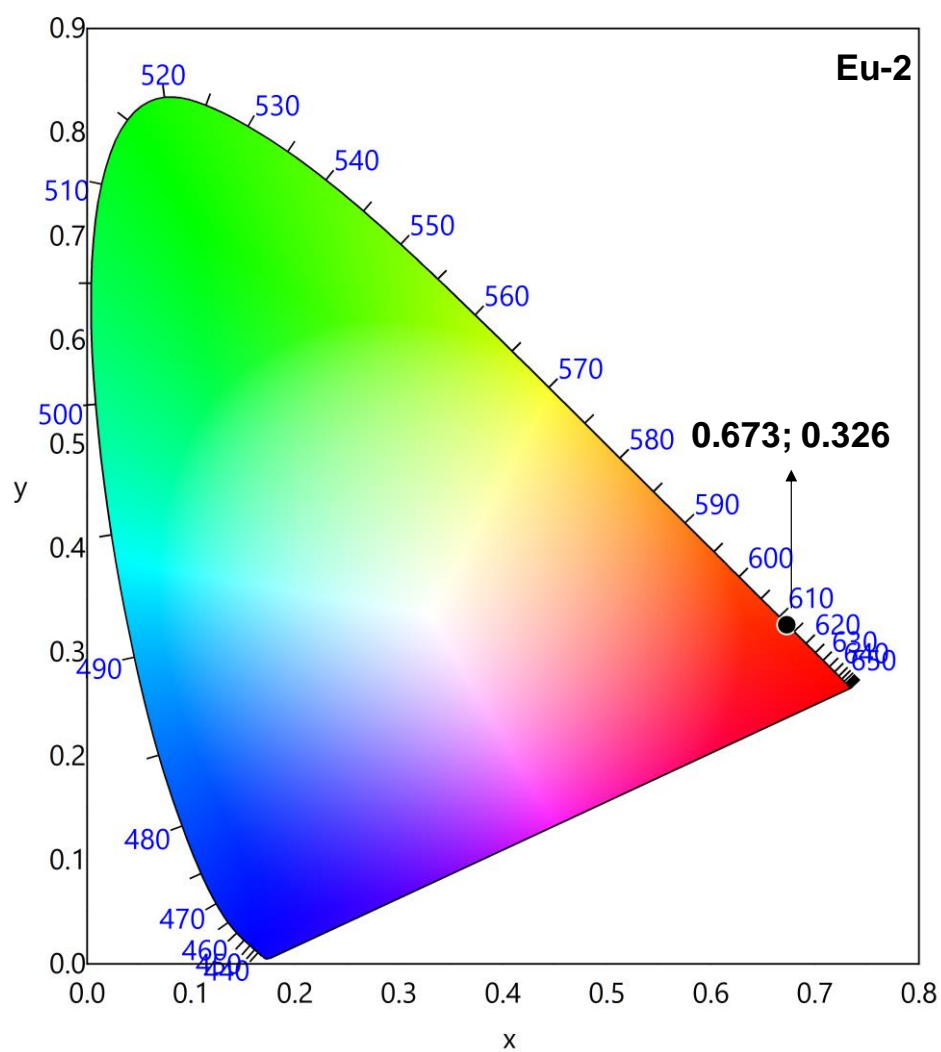

**Fig. S9.** 1931 CIE chromaticity diagram of **Eu-2** showing the observed color in DCM solution at RT.

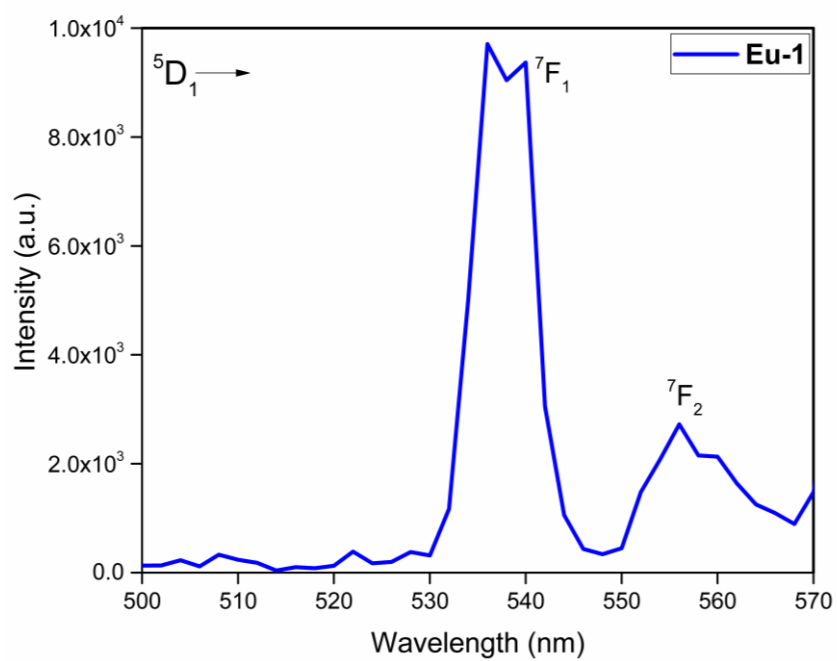

**Fig. S10.** Magnification of the region between 500 – 570 nm displaying  $^5D_1 \rightarrow ^7F_{1-2}$  transitions at RT for **Eu-1** complex.

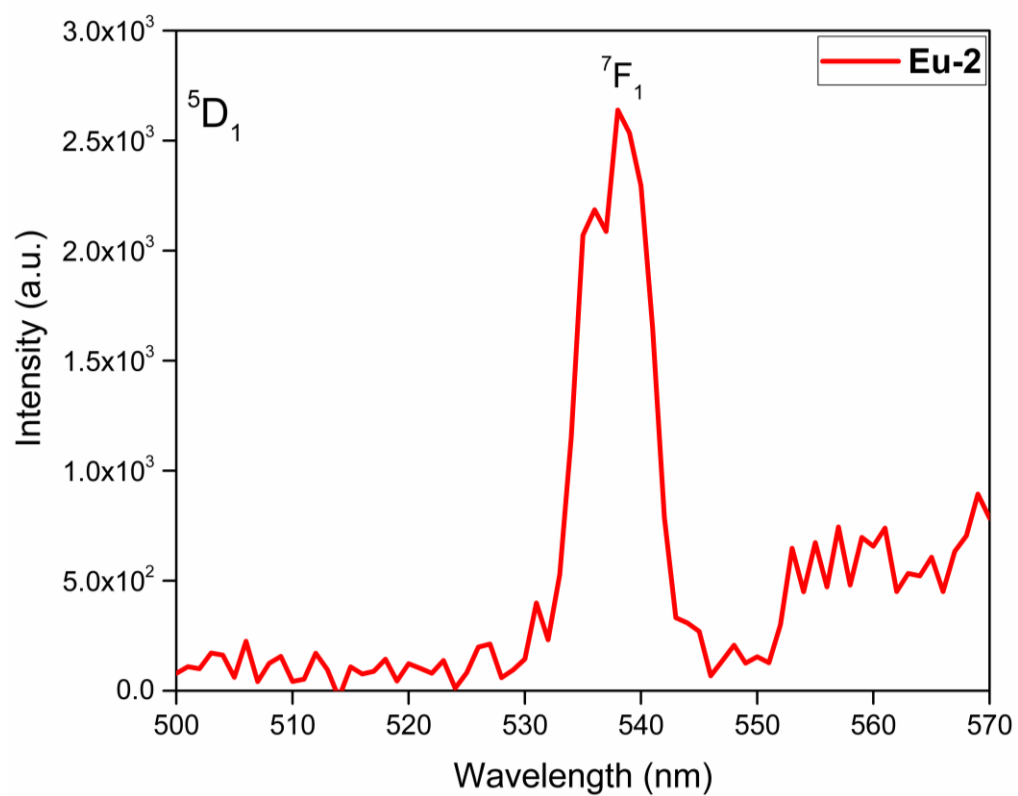

**Fig. S11.** Magnification of the region between 500 – 570 nm displaying  $^5D_1 \rightarrow ^7F_1$  transitions at RT for **Eu-2** complex.

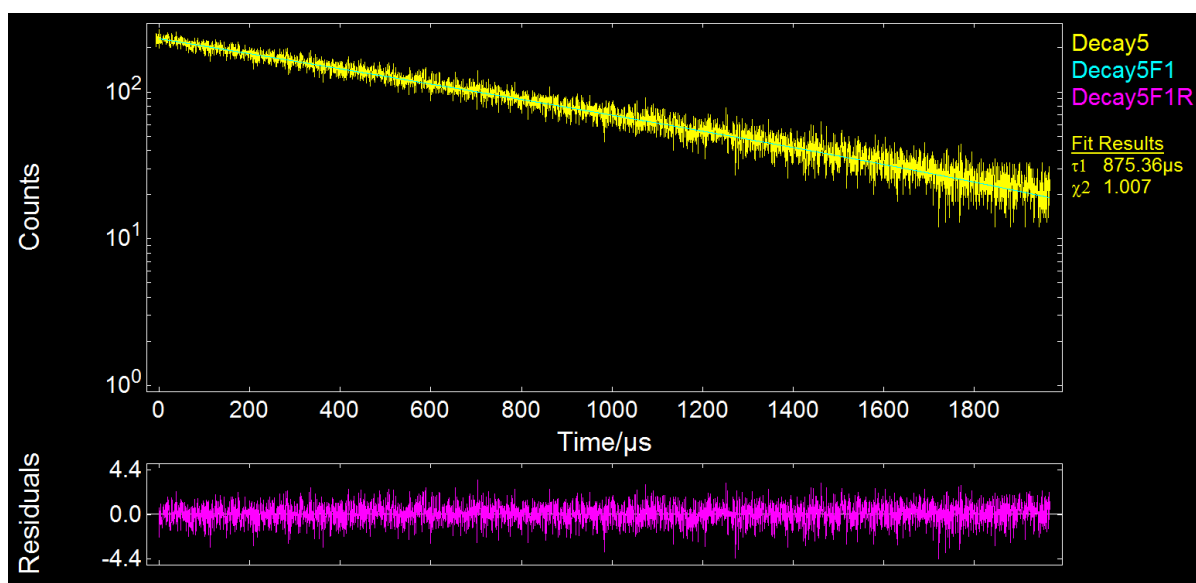

**Fig. S12.** Decay curve of **Eu-1** with fitted curve and observed luminescence lifetime in DCM at RT.

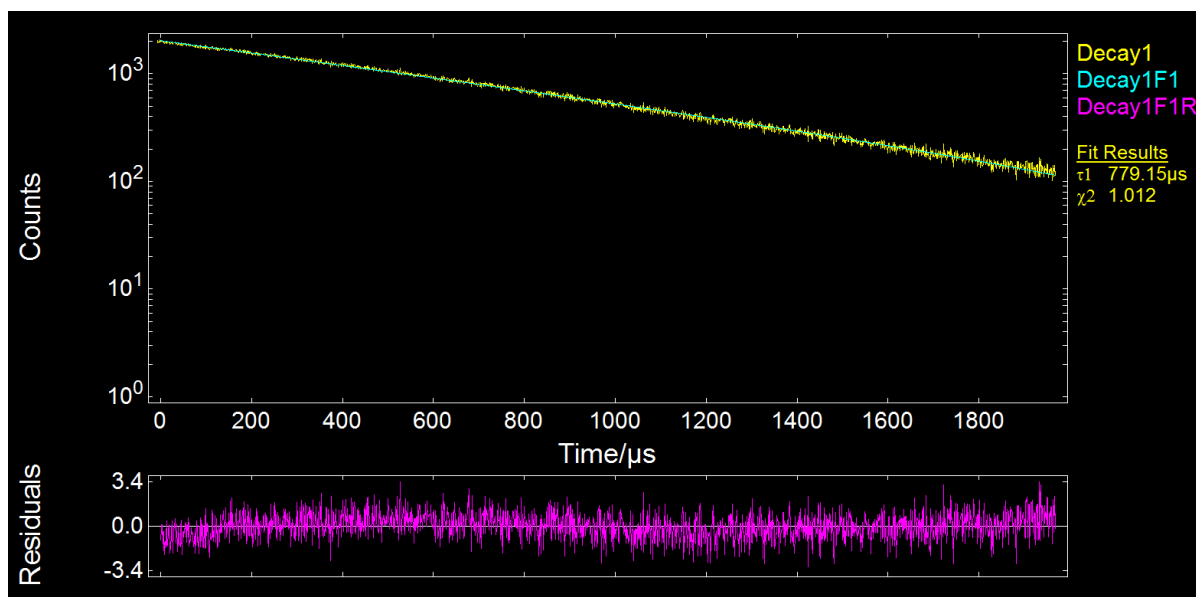

**Fig. S13.** Decay curve of **Eu-2** with fitted curve and observed luminescence lifetime in DCM at RT.

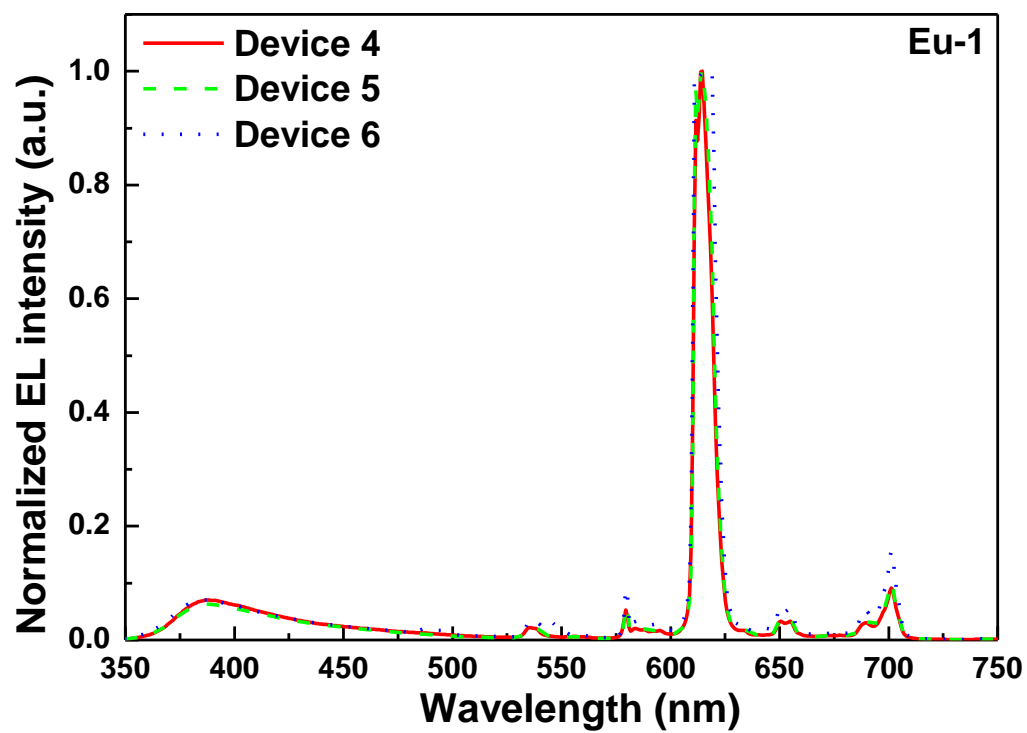

**Fig. S14.** Normalized EL spectra of the double-EML devices **4**, **5** and **6** of **Eu-1** operating at 10 mA/cm<sup>2</sup>.

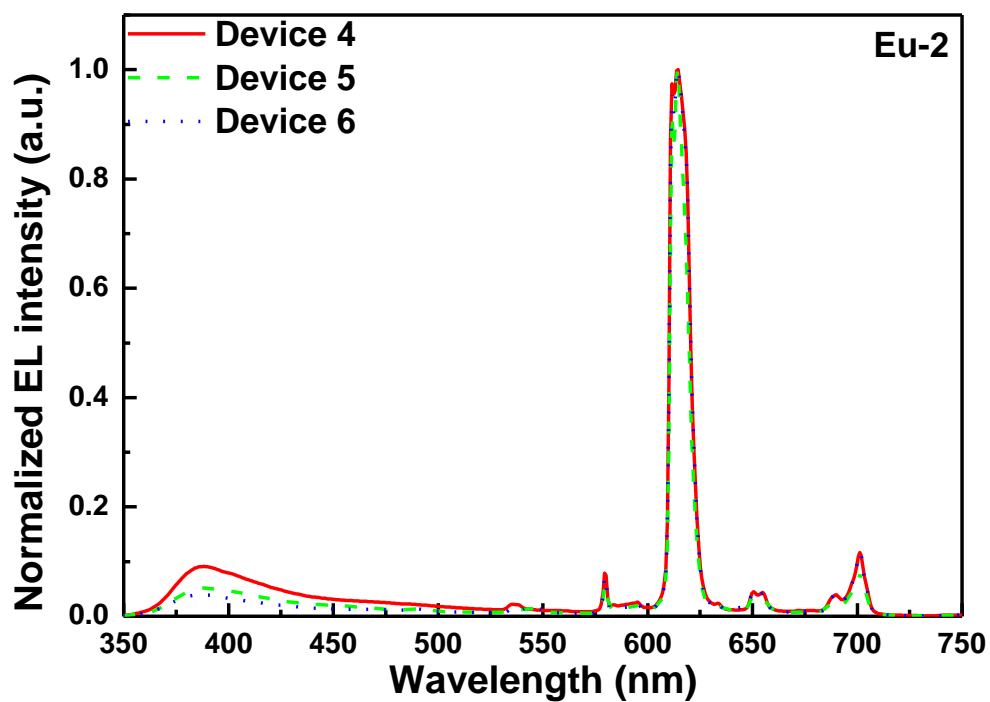

**Fig. S15.** Normalized EL spectra of the double-EML devices 4, 5 and 6 of Eu-2 operating at 10 mA/cm<sup>2</sup>.



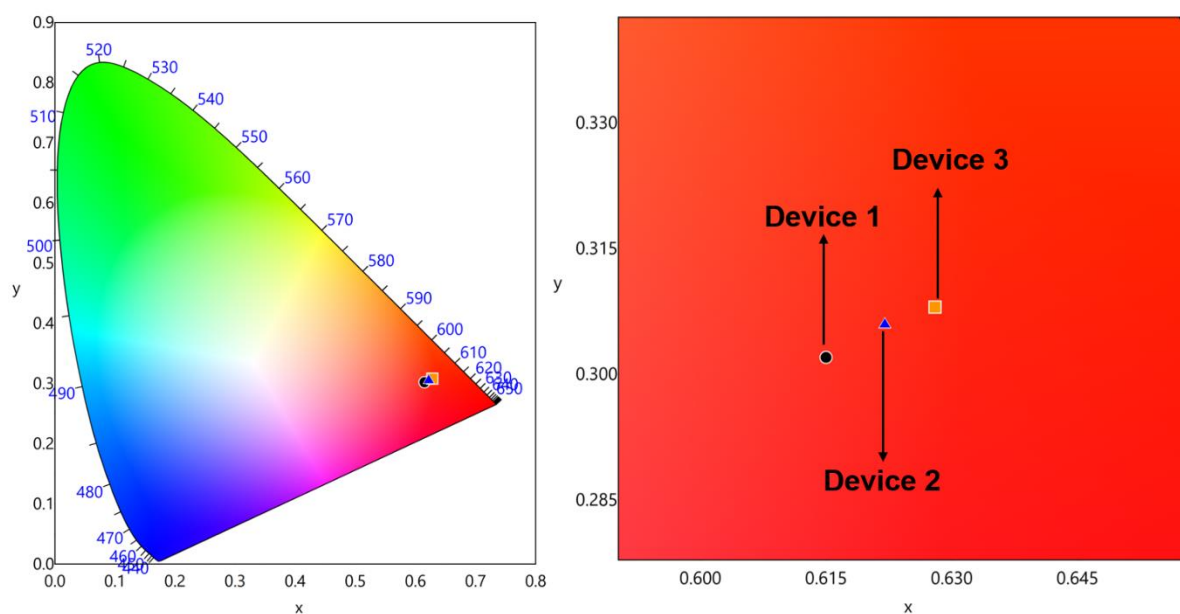

**Fig. S16.** CIE 1931 chromaticity diagrams of single EML devices **1**, **2** and **3** of **Eu-2** with magnified view operating at 10 mA/cm<sup>2</sup>.

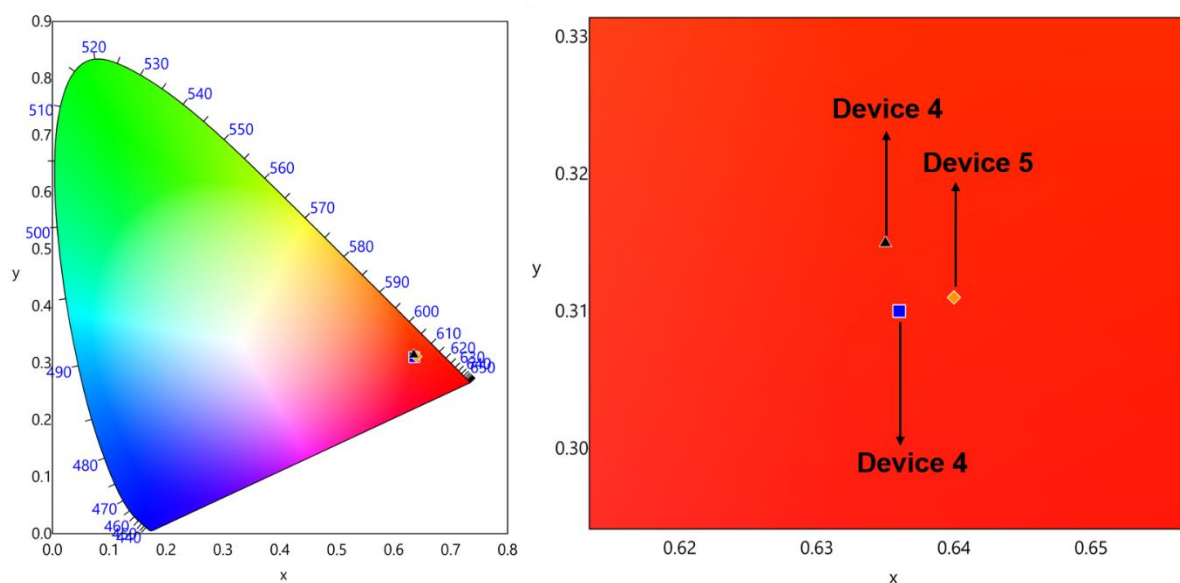

**Fig. S17.** CIE 1931 chromaticity diagrams of single EML devices **4**, **5** and **6** of **Eu-1** with magnified view operating at 10 mA/cm<sup>2</sup>.

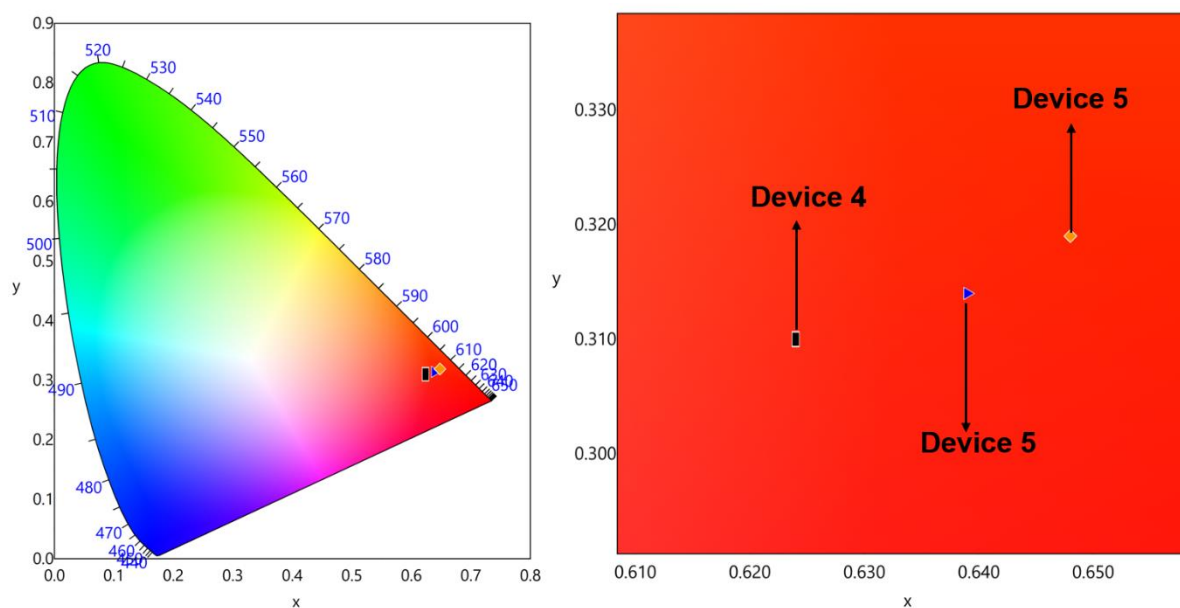

**Fig. S18.** CIE 1931 chromaticity diagrams of single EML devices **4**, **5** and **6** of **Eu-2** with magnified view operating at 10 mA/cm<sup>2</sup>.

## References

1. L. R. Melby, N. J. Rose, E. Abramson and J. C. Caris, *J. Am. Chem. Soc.*, 1964, **86**, 5117-5125.
2. (a) B. R. Judd, *Phys. Rev.*, 1962, **127**, 750-761; (b) G. S. Ofelt, *J. Chem. Phys.*, 1962, **37**, 511-520.
3. G. F. de Sa, O. L. Malta, C. D. Donega, A. M. Simas, R. L. Longo, P. A. Santa-Cruz and E. F. da Silva, *Coordin Chem Rev*, 2000, **196**, 165-195.
4. J. D. L. Dutra, N. B. D. Lima, R. O. Freire and A. M. Simas, *Sci. Rep.*, 2015, **5**, 13695.
5. J. D. Dutra, T. D. Bispo and R. O. Freire, *J. Comput. Chem.*, 2014, **35**, 772-775.
6. M. J. Weber, T. E. Varitimo and B. H. Matsinge, *Phys Rev B*, 1973, **8**, 47-53.
